# Supplementary material
Source: publisher site journal article supplement (https://www.spandidos-publications.com/5578/downloadSupplementary)
Supplement: Supplementary file 1 [file downloadSupplementary]

## Sheet: Sheet1
Table S1. List of variants in plasma ctDNA
Sample ID	Sample ID2	patient_ID	Flags	Sample Type	Panel	Filter Set	Custom Annotation	Input DNA Mass (ng)	Isolated DNA Mass (ng)	Plasma Volume (mL)	Sample Adapter	Subject ID	Date of Sample Collection	Analysis Name	Analysis ID	Mutation Class	Gene	Transcript	Coding Change	Amino Acid Change	Variant Description	Allele Fraction	No. Mutant Molecules per mL	Genomic Position	Variant Depth	Unique Depth	Exon Number	Total Exons	EXAC Overall Frequency	Highest Subpopulation Frequency in EXAC	1000 Genomes Frequency	Highest Subpopulation Frequency in 1000 Genomes	dbSNP ID	dbSNP Frequency	COSMIC ID	Total COSMIC Samples (All Tissues)	Total COSMIC Confirmed Somatic (All Tissues)	COSMIC Leading Three Reported Primary Tissues	TCGA Leading Three Reported Primary Cancer Types	Loci of Interest	CNV Score	Fusion Partner Gene 1	Fusion Breakpoint 1	Fusion Partner Gene 2	Fusion Breakpoint 2	Paired Reads Spanning Fusion Breakpoint	Number of Read Pairs	Variants Before Filtering	Variants After Filtering
UC03-1	1	UC03		Plasma	Expanded	RocheDefault	N/A	20	N/A	N/A	SA 16	CTD_005_16	43803	CTD_005	ACQL_IL7U9RBlJP0aU8TsRbY	SNV	KDR	ENST00000263923.4	c.2455C>T	p.Arg819*	Stop gained	0.0028	N/A	chr4:55098191	8	2880	17	30	N/A	N/A	N/A	N/A	N/A	N/A	COSM1211804	3	2	large_intestine (2 confirmed somatic of 3)	N/A	Absent	N/A	N/A	N/A	N/A	N/A	N/A	20034292	75	5
UC03-1	1	UC03		Plasma	Expanded	RocheDefault	N/A	20	N/A	N/A	SA 16	CTD_005_16	43803	CTD_005	ACQL_IL7U9RBlJP0aU8TsRbY	SNV	RB1	ENST00000267163.4	c.1862G>A	p.Arg621His	Missense variant	0.0052	N/A	chr13:48456251	9	1723	19	27	5.77e-05	0.00901% (NFE)	N/A	N/A	rs373601944	5.8e-05	COSM4962401;COSM4962402	2	1	haematopoietic_and_lymphoid_tissue (0 confirmed somatic of 1);pancreas (1 confirmed somatic of 1)	UCEC (Number of Cases: 1)	Absent	N/A	N/A	N/A	N/A	N/A	N/A	20034292	75	5
UC03-1	1	UC03		Plasma	Expanded	RocheDefault	N/A	20	N/A	N/A	SA 16	CTD_005_16	43803	CTD_005	ACQL_IL7U9RBlJP0aU8TsRbY	SNV	TP53	ENST00000269305.8;ENST00000413465.6;ENST00000420246.6;ENST00000455263.6;ENST00000615910.4	c.637C>T;c.637C>T;c.637C>T;c.637C>T;c.604C>T	p.Arg213*;p.Arg213*;p.Arg213*;p.Arg213*;p.Arg202*	Stop gained;Stop gained;Stop gained;Stop gained;Stop gained	0.0502	N/A	chr17:7674894	134	2667	6;5;6;6;6	11;7;12;12;11	8.25e-06	0.00150% (NFE)	N/A	N/A	rs397516436	8e-06	COSM10654;COSM1638393;COSM3378350;COSM99615;COSM99616;COSM99617;COSM99618	405	185	large_intestine (38 confirmed somatic of 91);breast (23 confirmed somatic of 52);oesophagus (26 confirmed somatic of 45)	COAD (Number of Cases: 9);HNSC (Number of Cases: 9);BRCA (Number of Cases: 6)	Absent	N/A	N/A	N/A	N/A	N/A	N/A	20034292	75	5
UC03-1	1	UC03		Plasma	Expanded	RocheDefault	N/A	20	N/A	N/A	SA 16	CTD_005_16	43803	CTD_005	ACQL_IL7U9RBlJP0aU8TsRbY	SNV	VHL	ENST00000256474.2	c.470C>T	p.Thr157Ile	Missense variant	0.0077	N/A	chr3:10149793	16	2066	3	3	N/A	N/A	N/A	N/A	rs869025660	N/A	COSM18025	5	3	kidney (3 confirmed somatic of 4);soft_tissue (0 confirmed somatic of 1)	N/A	Absent	N/A	N/A	N/A	N/A	N/A	N/A	20034292	75	5
UC03-1	1	UC03	N/A	Plasma	Expanded	RocheDefault	N/A	20	N/A	N/A	SA 16	CTD_005_16	43803	CTD_005	ACQL_IL7U9RBlJP0aU8TsRbY	CNV	ERBB2	N/A	N/A	N/A	N/A	N/A	N/A	chr17:39098318-39728057	N/A	N/A	N/A	N/A	N/A	N/A	N/A	N/A	N/A	N/A	N/A	N/A	N/A	N/A	N/A	N/A	17.4769	N/A	N/A	N/A	N/A	N/A	20034292	75	5
UC02-1	1	UC02		Plasma	Expanded	RocheDefault	N/A	20	N/A	N/A	SA 15	CTD_005_15	43803	CTD_005	ACQL_IL7U9RBlJP0aU8TsRbY	SNV	ERBB2	ENST00000269571.9;ENST00000584450.5;ENST00000541774.5	c.1958C>G;c.1958C>G;c.1913C>G	p.Ser653Cys;p.Ser653Cys;p.Ser638Cys	Missense variant;Missense variant;Missense variant	0.0056	N/A	chr17:39723330	18	3215	17;17;17	27;26;27	N/A	N/A	N/A	N/A	N/A	N/A	COSM2838154	1	0	urinary_tract (0 confirmed somatic of 1)	BLCA (Number of Cases: 1)	Absent	N/A	N/A	N/A	N/A	N/A	N/A	20182326	96	5
UC02-1	1	UC02		Plasma	Expanded	RocheDefault	N/A	20	N/A	N/A	SA 15	CTD_005_15	43803	CTD_005	ACQL_IL7U9RBlJP0aU8TsRbY	SNV	KDR	ENST00000263923.4	c.2658C>G	p.Leu886Leu	Synonymous variant	0.0037	N/A	chr4:55096299	11	2967	19	30	N/A	N/A	N/A	N/A	N/A	N/A	COSM6588409	1	1	breast (1 confirmed somatic of 1)	LGG (Number of Cases: 1)	Absent	N/A	N/A	N/A	N/A	N/A	N/A	20182326	96	5
UC02-1	1	UC02		Plasma	Expanded	RocheDefault	N/A	20	N/A	N/A	SA 15	CTD_005_15	43803	CTD_005	ACQL_IL7U9RBlJP0aU8TsRbY	SNV	PTEN	ENST00000371953.7	c.388C>G	p.Arg130Gly	Missense variant	0.0011	N/A	chr10:87933147	3	2840	5	9	N/A	N/A	N/A	N/A	rs121909224	N/A	COSM5219	163	96	endometrium (85 confirmed somatic of 147);central_nervous_system (4 confirmed somatic of 6);lung (4 confirmed somatic of 4)	UCEC (Number of Cases: 33);UCS (Number of Cases: 1)	Present	N/A	N/A	N/A	N/A	N/A	N/A	20182326	96	5
UC02-1	1	UC02		Plasma	Expanded	RocheDefault	N/A	20	N/A	N/A	SA 15	CTD_005_15	43803	CTD_005	ACQL_IL7U9RBlJP0aU8TsRbY	SNV	TP53	ENST00000269305.8;ENST00000413465.6;ENST00000420246.6;ENST00000455263.6;ENST00000615910.4	c.773A>G;c.773A>G;c.773A>G;c.773A>G;c.740A>G	p.Glu258Gly;p.Glu258Gly;p.Glu258Gly;p.Glu258Gly;p.Glu247Gly	Missense variant;Missense variant;Missense variant;Missense variant;Missense variant	0.0059	N/A	chr17:7674190	16	2725	7;6;7;7;7	11;7;12;12;11	N/A	N/A	N/A	N/A	N/A	N/A	COSM1564205;COSM1564206;COSM44168;COSM4946285;COSM4946286	12	5	large_intestine (2 confirmed somatic of 3);liver (0 confirmed somatic of 3);biliary_tract (1 confirmed somatic of 1)	READ (Number of Cases: 1)	Absent	N/A	N/A	N/A	N/A	N/A	N/A	20182326	96	5
UC02-1	1	UC02		Plasma	Expanded	RocheDefault	N/A	20	N/A	N/A	SA 15	CTD_005_15	43803	CTD_005	ACQL_IL7U9RBlJP0aU8TsRbY	SNV	TP53	ENST00000269305.8;ENST00000413465.6;ENST00000420246.6;ENST00000455263.6;ENST00000615910.4	c.709A>G;c.709A>G;c.709A>G;c.709A>G;c.676A>G	p.Met237Val;p.Met237Val;p.Met237Val;p.Met237Val;p.Met226Val	Missense variant;Missense variant;Missense variant;Missense variant;Missense variant	0.0074	N/A	chr17:7674254	37	5013	7;6;7;7;7	11;7;12;12;11	N/A	N/A	N/A	N/A	rs730882004	N/A	COSM1610841;COSM1610842;COSM1610843;COSM3717648;COSM3717649;COSM44525	11	5	breast (0 confirmed somatic of 2);large_intestine (1 confirmed somatic of 2);liver (2 confirmed somatic of 2)	LGG (Number of Cases: 2);HNSC (Number of Cases: 1)	Absent	N/A	N/A	N/A	N/A	N/A	N/A	20182326	96	5
UC11-1	1	UC11		Plasma	Expanded	RocheDefault	N/A	20	N/A	N/A	SA 7	N/A	N/A	CTD_006	AYAbFCfDKixD_bg1J1WtJg0e	SNV	JAK3	ENST00000458235.5	c.1533G>T	p.Met511Ile	Missense variant	0.0008	N/A	chr19:17838299	2	2599	11	24	N/A	N/A	N/A	N/A	N/A	N/A	COSM306058;COSM4776563	11	2	haematopoietic_and_lymphoid_tissue (2 confirmed somatic of 11)	N/A	Present	N/A	N/A	N/A	N/A	N/A	N/A	15979185	85	3
UC11-1	1	UC11	N/A	Plasma	Expanded	RocheDefault	N/A	20	N/A	N/A	SA 7	N/A	N/A	CTD_006	AYAbFCfDKixD_bg1J1WtJg0e	CNV	MET	N/A	N/A	N/A	N/A	N/A	N/A	chr7:150501-148811780	N/A	N/A	N/A	N/A	N/A	N/A	N/A	N/A	N/A	N/A	N/A	N/A	N/A	N/A	N/A	N/A	2.77405	N/A	N/A	N/A	N/A	N/A	15979185	85	3
UC11-1	1	UC11	N/A	Plasma	Expanded	RocheDefault	N/A	20	N/A	N/A	SA 7	N/A	N/A	CTD_006	AYAbFCfDKixD_bg1J1WtJg0e	CNV	EGFR	N/A	N/A	N/A	N/A	N/A	N/A	chr7:150501-148811780	N/A	N/A	N/A	N/A	N/A	N/A	N/A	N/A	N/A	N/A	N/A	N/A	N/A	N/A	N/A	N/A	2.94764	N/A	N/A	N/A	N/A	N/A	15979185	85	3
UC20-1	1	UC20		Plasma	Expanded	RocheDefault	N/A	20	N/A	N/A	SA 16	N/A	N/A	CTD_006	AYAbFCfDKixD_bg1J1WtJg0e	SNV	FGFR3	ENST00000481110.6;ENST00000340107.8;ENST00000440486.6	c.746C>G;c.746C>G;c.746C>G	p.Ser249Cys;p.Ser249Cys;p.Ser249Cys	Missense variant;Missense variant;Missense variant	0.0905	N/A	chr4:1801841	76	840	7;7;7	17;18;18	9.65e-06	0.00178% (NFE)	N/A	N/A	rs121913483	1e-05	COSM1149892;COSM715	1345	367	urinary_tract (343 confirmed somatic of 1297);skin (8 confirmed somatic of 27);upper_aerodigestive_tract (8 confirmed somatic of 9)	BLCA (Number of Cases: 30);HNSC (Number of Cases: 3);LUSC (Number of Cases: 3)	Present	N/A	N/A	N/A	N/A	N/A	N/A	21024554	95	6
UC20-1	1	UC20		Plasma	Expanded	RocheDefault	N/A	20	N/A	N/A	SA 16	N/A	N/A	CTD_006	AYAbFCfDKixD_bg1J1WtJg0e	SNV	FGFR3	ENST00000481110.6;ENST00000340107.8;ENST00000440486.6	c.840C>T;c.840C>T;c.840C>T	p.Asp280Asp;p.Asp280Asp;p.Asp280Asp	Synonymous variant;Synonymous variant;Synonymous variant	0.1168	N/A	chr4:1801935	194	1661	7;7;7	17;18;18	1.7e-05	0.0118% (EAS)	N/A	N/A	rs776706695	1.7e-05	N/A	0	0	N/A	COAD (Number of Cases: 1)	Absent	N/A	N/A	N/A	N/A	N/A	N/A	21024554	95	6
UC20-1	1	UC20		Plasma	Expanded	RocheDefault	N/A	20	N/A	N/A	SA 16	N/A	N/A	CTD_006	AYAbFCfDKixD_bg1J1WtJg0e	SNV	RB1	ENST00000267163.4	c.649C>T	p.Gln217*	Stop gained	0.133	N/A	chr13:48360058	334	2511	7	27	N/A	N/A	N/A	N/A	N/A	N/A	COSM1300224;COSM13405	8	7	urinary_tract (3 confirmed somatic of 4);breast (2 confirmed somatic of 2);lung (2 confirmed somatic of 2)	BLCA (Number of Cases: 2);ACC (Number of Cases: 1)	Absent	N/A	N/A	N/A	N/A	N/A	N/A	21024554	95	6
UC20-1	1	UC20		Plasma	Expanded	RocheDefault	N/A	20	N/A	N/A	SA 16	N/A	N/A	CTD_006	AYAbFCfDKixD_bg1J1WtJg0e	SNV	TP53	ENST00000269305.8;ENST00000413465.6;ENST00000420246.6;ENST00000455263.6;ENST00000615910.4	c.738G>A;c.738G>A;c.738G>A;c.738G>A;c.705G>A	p.Met246Ile;p.Met246Ile;p.Met246Ile;p.Met246Ile;p.Met235Ile	Missense variant;Missense variant;Missense variant;Missense variant;Missense variant	0.1687	N/A	chr17:7674225	592	3510	7;6;7;7;7	11;7;12;12;11	N/A	N/A	N/A	N/A	rs1019340046	N/A	COSM2744603;COSM4271803;COSM437495;COSM437496;COSM437497;COSM44310	26	5	upper_aerodigestive_tract (1 confirmed somatic of 7);ovary (0 confirmed somatic of 5);breast (1 confirmed somatic of 4)	BRCA (Number of Cases: 1);HNSC (Number of Cases: 1);STAD (Number of Cases: 1)	Absent	N/A	N/A	N/A	N/A	N/A	N/A	21024554	95	6
UC20-1	1	UC20		Plasma	Expanded	RocheDefault	N/A	20	N/A	N/A	SA 16	N/A	N/A	CTD_006	AYAbFCfDKixD_bg1J1WtJg0e	SNV	TSC2	ENST00000568454.5;ENST00000219476.7	c.2242C>G;c.2209C>G	p.Leu748Val;p.Leu737Val	Missense variant;Missense variant	0.0074	N/A	chr16:2072352	29	3914	20;20	40;42	N/A	N/A	N/A	N/A	N/A	N/A	COSM5423842;COSM5423843	2	2	adrenal_gland (1 confirmed somatic of 1);prostate (1 confirmed somatic of 1)	N/A	Absent	N/A	N/A	N/A	N/A	N/A	N/A	21024554	95	6
UC20-1	1	UC20	N/A	Plasma	Expanded	RocheDefault	N/A	20	N/A	N/A	SA 16	N/A	N/A	CTD_006	AYAbFCfDKixD_bg1J1WtJg0e	CNV	ERBB2	N/A	N/A	N/A	N/A	N/A	N/A	chr17:23162232-58415611	N/A	N/A	N/A	N/A	N/A	N/A	N/A	N/A	N/A	N/A	N/A	N/A	N/A	N/A	N/A	N/A	6.54487	N/A	N/A	N/A	N/A	N/A	21024554	95	6
UC17-1	1	UC17		Plasma	Expanded	RocheDefault	N/A	20	N/A	N/A	SA 13	N/A	N/A	CTD_006	AYAbFCfDKixD_bg1J1WtJg0e	SNV	SMO	ENST00000249373.7	c.1265-3C>T	N/A	Splice region variant & Intron variant	0.0345	N/A	chr7:129208756	58	1679	6	11	N/A	N/A	N/A	N/A	N/A	N/A	COSM4447193	1	1	skin (1 confirmed somatic of 1)	N/A	Absent	N/A	N/A	N/A	N/A	N/A	N/A	15144826	80	1
UC27-1	1	UC27		Plasma	Expanded	RocheDefault	N/A	10	N/A	N/A	SA 7	N/A	N/A	CTD_007	AYULWcSdHfxMzZyY8Y_aW8Rc	SNV	TP53	ENST00000269305.8;ENST00000413465.6;ENST00000420246.6;ENST00000455263.6;ENST00000615910.4	c.772G>A;c.772G>A;c.772G>A;c.772G>A;c.739G>A	p.Glu258Lys;p.Glu258Lys;p.Glu258Lys;p.Glu258Lys;p.Glu247Lys	Missense variant;Missense variant;Missense variant;Missense variant;Missense variant	0.5583	N/A	chr17:7674191	1632	2923	7;6;7;7;7	11;7;12;12;11	8.25e-06	0.00150% (NFE)	N/A	N/A	rs121912652	8e-06	COSM10988;COSM1172461;COSM1172462;COSM1679494;COSM4271777	56	11	large_intestine (3 confirmed somatic of 9);urinary_tract (0 confirmed somatic of 8);oesophagus (4 confirmed somatic of 7)	BLCA (Number of Cases: 1);LIHC (Number of Cases: 1);LUSC (Number of Cases: 1)	Absent	N/A	N/A	N/A	N/A	N/A	N/A	21172282	84	2
UC27-1	1	UC27	N/A	Plasma	Expanded	RocheDefault	N/A	10	N/A	N/A	SA 7	N/A	N/A	CTD_007	AYULWcSdHfxMzZyY8Y_aW8Rc	CNV	ERBB2	N/A	N/A	N/A	N/A	N/A	N/A	chr17:28574488-58415611	N/A	N/A	N/A	N/A	N/A	N/A	N/A	N/A	N/A	N/A	N/A	N/A	N/A	N/A	N/A	N/A	0.0908728	N/A	N/A	N/A	N/A	N/A	21172282	84	2
UC23-1	1	UC23		Plasma	Expanded	RocheDefault	N/A	10	N/A	N/A	SA 3	N/A	N/A	CTD_007	AYULWcSdHfxMzZyY8Y_aW8Rc	INDEL	PTEN	ENST00000371953.7	c.968dupA	p.Asn323fs	Frameshift variant	0.001	N/A	chr10:87961054	1	976	8	9	N/A	N/A	N/A	N/A	rs587783058	N/A	COSM23626;COSM4990;COSM4994	42	35	endometrium (26 confirmed somatic of 31);large_intestine (5 confirmed somatic of 6);breast (1 confirmed somatic of 1)	UCEC (Number of Cases: 8);COAD (Number of Cases: 1);LIHC (Number of Cases: 1)	Present	N/A	N/A	N/A	N/A	N/A	N/A	19311394	76	1
UC22-1	1	UC22		Plasma	Expanded	RocheDefault	N/A	10	N/A	N/A	SA 2	N/A	N/A	CTD_007	AYULWcSdHfxMzZyY8Y_aW8Rc	SNV	ALK	ENST00000389048.7	c.1229G>A	p.Gly410Glu	Missense variant	0.0213	N/A	chr2:29383785	34	1598	5	29	8.24e-06	0.00150% (NFE)	N/A	N/A	rs760717114	8e-06	COSM3581004	1	1	skin (1 confirmed somatic of 1)	SKCM (Number of Cases: 1)	Absent	N/A	N/A	N/A	N/A	N/A	N/A	18067294	83	3
UC22-1	1	UC22		Plasma	Expanded	RocheDefault	N/A	10	N/A	N/A	SA 2	N/A	N/A	CTD_007	AYULWcSdHfxMzZyY8Y_aW8Rc	SNV	PTEN	ENST00000371953.7	c.275A>G	p.Asp92Gly	Missense variant	0.0026	N/A	chr10:87933034	3	1152	5	9	N/A	N/A	N/A	N/A	N/A	N/A	COSM5099	4	4	endometrium (3 confirmed somatic of 3);upper_aerodigestive_tract (1 confirmed somatic of 1)	UCEC (Number of Cases: 1)	Absent	N/A	N/A	N/A	N/A	N/A	N/A	18067294	83	3
UC22-1	1	UC22		Plasma	Expanded	RocheDefault	N/A	10	N/A	N/A	SA 2	N/A	N/A	CTD_007	AYULWcSdHfxMzZyY8Y_aW8Rc	SNV	TP53	ENST00000269305.8;ENST00000413465.6;ENST00000420246.6;ENST00000455263.6;ENST00000615910.4	c.643A>G;c.643A>G;c.643A>G;c.643A>G;c.610A>G	p.Ser215Gly;p.Ser215Gly;p.Ser215Gly;p.Ser215Gly;p.Ser204Gly	Missense variant;Missense variant;Missense variant;Missense variant;Missense variant	0.0269	N/A	chr17:7674888	39	1450	6;5;6;6;6	11;7;12;12;11	N/A	N/A	N/A	N/A	rs886039484	N/A	COSM1318435;COSM1318436;COSM1318437;COSM1318438;COSM3388196;COSM3388197;COSM43951	25	15	large_intestine (7 confirmed somatic of 8);lung (1 confirmed somatic of 4);oesophagus (3 confirmed somatic of 4)	LGG (Number of Cases: 1);LUSC (Number of Cases: 1);PAAD (Number of Cases: 1)	Absent	N/A	N/A	N/A	N/A	N/A	N/A	18067294	83	3
UC25-1	1	UC25		Plasma	Expanded	RocheDefault	N/A	10	N/A	N/A	SA 5	N/A	N/A	CTD_007	AYULWcSdHfxMzZyY8Y_aW8Rc	SNV	FGFR1	ENST00000425967.7;ENST00000447712.6;ENST00000335922.9;ENST00000397103.5	c.2294G>A;c.2201G>A;c.2171G>A;c.1934G>A	p.Arg765Gln;p.Arg734Gln;p.Arg724Gln;p.Arg645Gln	Missense variant;Missense variant;Missense variant;Missense variant	0.4424	N/A	chr8:38414009	849	1919	18;17;18;15	19;18;19;16	2.5e-05	0.0349% (EAS)	N/A	N/A	rs760882547	2.5e-05	COSM5063185;COSM5063186;COSM5063187;COSM5063188	1	1	stomach (1 confirmed somatic of 1)	N/A	Absent	N/A	N/A	N/A	N/A	N/A	N/A	20502143	78	2
UC25-1	1	UC25		Plasma	Expanded	RocheDefault	N/A	10	N/A	N/A	SA 5	N/A	N/A	CTD_007	AYULWcSdHfxMzZyY8Y_aW8Rc	SNV	TP53	ENST00000269305.8;ENST00000413465.6;ENST00000420246.6;ENST00000455263.6;ENST00000615910.4	c.536A>G;c.536A>G;c.536A>G;c.536A>G;c.503A>G	p.His179Arg;p.His179Arg;p.His179Arg;p.His179Arg;p.His168Arg	Missense variant;Missense variant;Missense variant;Missense variant;Missense variant	0.0044	N/A	chr17:7675076	6	1366	5;4;5;5;5	11;7;12;12;11	N/A	N/A	N/A	N/A	N/A	N/A	COSM10889;COSM1645241;COSM214222;COSM214223;COSM214224;COSM214225;COSM3396280	182	77	breast (11 confirmed somatic of 27);central_nervous_system (11 confirmed somatic of 24);oesophagus (10 confirmed somatic of 24)	LGG (Number of Cases: 7);BRCA (Number of Cases: 6);HNSC (Number of Cases: 4)	Absent	N/A	N/A	N/A	N/A	N/A	N/A	20502143	78	2
UC26-1	1	UC26		Plasma	Expanded	RocheDefault	N/A	10	N/A	N/A	SA 6	N/A	N/A	CTD_007	AYULWcSdHfxMzZyY8Y_aW8Rc	SNV	BRAF	ENST00000288602.10	c.1397G>A	p.Gly466Glu	Missense variant	0.0117	N/A	chr7:140781611	30	2566	11	18	N/A	N/A	N/A	N/A	rs121913351	N/A	COSM453	20	13	skin (8 confirmed somatic of 9);NS (0 confirmed somatic of 2);haematopoietic_and_lymphoid_tissue (1 confirmed somatic of 2)	SKCM (Number of Cases: 4);HNSC (Number of Cases: 1)	Absent	N/A	N/A	N/A	N/A	N/A	N/A	24853299	71	1
UC29-1	1	UC29		Plasma	Expanded	RocheDefault	N/A	40	N/A	4	SA 10	N/A	N/A	AVENIO_CTD_008_2	AIi-USe9v8lFga0d5Kl6eFwJ	SNV	CTNNB1	ENST00000349496.9	c.133T>C	p.Ser45Pro	Missense variant	0.0105	N/A	chr3:41224645	6	571	3	15	N/A	N/A	N/A	N/A	rs121913407	N/A	COSM5663	386	183	liver (95 confirmed somatic of 122);soft_tissue (1 confirmed somatic of 97);adrenal_gland (43 confirmed somatic of 89)	LIHC (Number of Cases: 11);ACC (Number of Cases: 4);COAD (Number of Cases: 2)	Present	N/A	N/A	N/A	N/A	N/A	N/A	21344774	82	2
UC29-1	1	UC29		Plasma	Expanded	RocheDefault	N/A	40	N/A	4	SA 10	N/A	N/A	AVENIO_CTD_008_2	AIi-USe9v8lFga0d5Kl6eFwJ	SNV	TP53	ENST00000269305.8;ENST00000413465.6;ENST00000420246.6;ENST00000455263.6;ENST00000615910.4	c.638G>T;c.638G>T;c.638G>T;c.638G>T;c.605G>T	p.Arg213Leu;p.Arg213Leu;p.Arg213Leu;p.Arg213Leu;p.Arg202Leu	Missense variant;Missense variant;Missense variant;Missense variant;Missense variant	0.0217	N/A	chr17:7674893	12	554	6;5;6;6;6	11;7;12;12;11	N/A	N/A	N/A	N/A	N/A	N/A	COSM1741334;COSM241997;COSM241998;COSM241999;COSM242000;COSM3378349;COSM43650	59	28	liver (9 confirmed somatic of 12);large_intestine (4 confirmed somatic of 9);pancreas (3 confirmed somatic of 7)	COAD (Number of Cases: 1);HNSC (Number of Cases: 1);LIHC (Number of Cases: 1)	Absent	N/A	N/A	N/A	N/A	N/A	N/A	21344774	82	2
UC30-1	1	UC30		Plasma	Expanded	RocheDefault	N/A	40	N/A	4	SA 12	N/A	N/A	AVENIO_CTD_008_2	AIi-USe9v8lFga0d5Kl6eFwJ	SNV	TP53	ENST00000269305.8;ENST00000413465.6;ENST00000420246.6;ENST00000455263.6;ENST00000615910.4	c.395A>G;c.395A>G;c.395A>G;c.395A>G;c.362A>G	p.Lys132Arg;p.Lys132Arg;p.Lys132Arg;p.Lys132Arg;p.Lys121Arg	Missense variant;Missense variant;Missense variant;Missense variant;Missense variant	0.5509	N/A	chr17:7675217	238	432	5;4;5;5;5	11;7;12;12;11	N/A	N/A	N/A	N/A	N/A	N/A	COSM11582;COSM1646844;COSM308310;COSM308311;COSM308312;COSM3388223	61	24	ovary (4 confirmed somatic of 11);large_intestine (5 confirmed somatic of 9);lung (4 confirmed somatic of 9)	SARC (Number of Cases: 2);COAD (Number of Cases: 1);LGG (Number of Cases: 1)	Absent	N/A	N/A	N/A	N/A	N/A	N/A	20365645	68	1
UC35-1	1	UC35		Plasma	Expanded	RocheDefault	N/A	40	N/A	4	SA 8	N/A	44307	CTD_009_analysis2	AbwkO2ccMehFJbj4Mpokhaj2	SNV	PIK3CA	ENST00000263967.3	c.277C>T	p.Arg93Trp	Missense variant	0.0052	N/A	chr3:179199102	18	3457	2	21	N/A	N/A	N/A	N/A	N/A	N/A	COSM1041455;COSM27493	38	19	endometrium (5 confirmed somatic of 20);large_intestine (10 confirmed somatic of 14);urinary_tract (2 confirmed somatic of 2)	UCEC (Number of Cases: 4);CESC (Number of Cases: 1);COAD (Number of Cases: 1)	Absent	N/A	N/A	N/A	N/A	N/A	N/A	14953715	79	3
UC35-1	1	UC35		Plasma	Expanded	RocheDefault	N/A	40	N/A	4	SA 8	N/A	44307	CTD_009_analysis2	AbwkO2ccMehFJbj4Mpokhaj2	SNV	TERT	ENST00000310581.9	c.-57A>C	N/A	5 prime UTR variant	0.0183	N/A	chr5:1295046	55	3007	1	16	N/A	N/A	N/A	N/A	rs878855297	N/A	N/A	0	0	N/A	LIHC (Number of Cases: 2)	Absent	N/A	N/A	N/A	N/A	N/A	N/A	14953715	79	3
UC35-1	1	UC35		Plasma	Expanded	RocheDefault	N/A	40	N/A	4	SA 8	N/A	44307	CTD_009_analysis2	AbwkO2ccMehFJbj4Mpokhaj2	SNV	TP53	ENST00000269305.8;ENST00000615910.4	c.1123C>A;c.1090C>A	p.Gln375Lys;p.Gln364Lys	Missense variant;Missense variant	0.0264	N/A	chr17:7669668	103	3907	11;11	11;11	N/A	N/A	N/A	N/A	N/A	N/A	COSM3403253;COSM3403254	1	1	central_nervous_system (1 confirmed somatic of 1)	GBM (Number of Cases: 1)	Absent	N/A	N/A	N/A	N/A	N/A	N/A	14953715	79	3
UC32-1	1	UC32		Plasma	Expanded	RocheDefault	N/A	35	N/A	4	SA 15	N/A	44222	CTD_009_analysis2	AbwkO2ccMehFJbj4Mpokhaj2	SNV	TP53	ENST00000269305.8;ENST00000420246.6;ENST00000455263.6;ENST00000615910.4	c.783-2A>T;c.783-2A>T;c.783-2A>T;c.750-2A>T	N/A;N/A;N/A;N/A	Splice acceptor variant & Intron variant;Splice acceptor variant & Intron variant;Splice acceptor variant & Intron variant;Splice acceptor variant & Intron variant	0.034	N/A	chr17:7673839	49	1442	7;7;7;7	10;11;11;10	N/A	N/A	N/A	N/A	N/A	N/A	COSM1230105;COSM45956;COSM4767339;COSM4767340	6	1	lung (0 confirmed somatic of 2);large_intestine (0 confirmed somatic of 1);oesophagus (0 confirmed somatic of 1)	N/A	Absent	N/A	N/A	N/A	N/A	N/A	N/A	16171205	76	1
UC33-1	1	UC33		Plasma	Expanded	RocheDefault	N/A	35	N/A	4	SA 6	N/A	44291	CTD_009_analysis2	AbwkO2ccMehFJbj4Mpokhaj2	SNV	TP53	ENST00000269305.8;ENST00000413465.6;ENST00000420246.6;ENST00000455263.6;ENST00000615910.4	c.273G>A;c.273G>A;c.273G>A;c.273G>A;c.273G>A	p.Trp91*;p.Trp91*;p.Trp91*;p.Trp91*;p.Trp91*	Stop gained;Stop gained;Stop gained;Stop gained;Stop gained	0.0551	N/A	chr17:7676096	152	2757	4;3;4;4;3	11;7;12;12;11	N/A	N/A	N/A	N/A	rs876660548	N/A	COSM1646881;COSM3958856;COSM44492;COSM562611;COSM562612	26	13	lung (3 confirmed somatic of 7);oesophagus (3 confirmed somatic of 3);upper_aerodigestive_tract (0 confirmed somatic of 3)	ESCA (Number of Cases: 2);LUSC (Number of Cases: 2);BRCA (Number of Cases: 1)	Absent	N/A	N/A	N/A	N/A	N/A	N/A	14471942	73	3
UC33-1	1	UC33	N/A	Plasma	Expanded	RocheDefault	N/A	35	N/A	4	SA 6	N/A	44291	CTD_009_analysis2	AbwkO2ccMehFJbj4Mpokhaj2	CNV	MET	N/A	N/A	N/A	N/A	N/A	N/A	chr7:150501-148811780	N/A	N/A	N/A	N/A	N/A	N/A	N/A	N/A	N/A	N/A	N/A	N/A	N/A	N/A	N/A	N/A	0.227045	N/A	N/A	N/A	N/A	N/A	14471942	73	3
UC33-1	1	UC33	N/A	Plasma	Expanded	RocheDefault	N/A	35	N/A	4	SA 6	N/A	44291	CTD_009_analysis2	AbwkO2ccMehFJbj4Mpokhaj2	CNV	EGFR	N/A	N/A	N/A	N/A	N/A	N/A	chr7:150501-148811780	N/A	N/A	N/A	N/A	N/A	N/A	N/A	N/A	N/A	N/A	N/A	N/A	N/A	N/A	N/A	N/A	0.40064	N/A	N/A	N/A	N/A	N/A	14471942	73	3
UC34-1	1	UC34		Plasma	Expanded	RocheDefault	N/A	50	N/A	4	SA 7	N/A	44288	CTD_009_analysis2	AbwkO2ccMehFJbj4Mpokhaj2	SNV	EGFR	ENST00000275493.6	c.3352G>A	p.Ala1118Thr	Missense variant	0.4761	N/A	chr7:55205336	1860	3907	28	28	1.66e-05	0.0126% (SAS)	N/A	N/A	rs770749711	1.7e-05	COSM327142	3	2	haematopoietic_and_lymphoid_tissue (1 confirmed somatic of 2);urinary_tract (1 confirmed somatic of 1)	N/A	Absent	N/A	N/A	N/A	N/A	N/A	N/A	19206530	76	4
UC34-1	1	UC34		Plasma	Expanded	RocheDefault	N/A	50	N/A	4	SA 7	N/A	44288	CTD_009_analysis2	AbwkO2ccMehFJbj4Mpokhaj2	SNV	PTEN	ENST00000371953.7	c.802-1G>A	N/A	Splice acceptor variant & Intron variant	0.012	N/A	chr10:87960893	21	1756	7	8	N/A	N/A	N/A	N/A	N/A	N/A	COSM28919	6	4	central_nervous_system (3 confirmed somatic of 3);endometrium (1 confirmed somatic of 2);lung (0 confirmed somatic of 1)	GBM (Number of Cases: 1);UCEC (Number of Cases: 1)	Absent	N/A	N/A	N/A	N/A	N/A	N/A	19206530	76	4
UC34-1	1	UC34		Plasma	Expanded	RocheDefault	N/A	50	N/A	4	SA 7	N/A	44288	CTD_009_analysis2	AbwkO2ccMehFJbj4Mpokhaj2	SNV	SMO	ENST00000249373.7	c.2176C>T	p.Arg726*	Stop gained	0.4747	N/A	chr7:129212263	1470	3097	12	12	1.55e-05	0.00281% (NFE)	N/A	N/A	N/A	N/A	N/A	0	0	N/A	STAD (Number of Cases: 1)	Absent	N/A	N/A	N/A	N/A	N/A	N/A	19206530	76	4
UC34-1	1	UC34		Plasma	Expanded	RocheDefault	N/A	50	N/A	4	SA 7	N/A	44288	CTD_009_analysis2	AbwkO2ccMehFJbj4Mpokhaj2	SNV	TP53	ENST00000269305.8;ENST00000420246.6;ENST00000455263.6;ENST00000615910.4	c.859G>T;c.859G>T;c.859G>T;c.826G>T	p.Glu287*;p.Glu287*;p.Glu287*;p.Glu276*	Stop gained;Stop gained;Stop gained;Stop gained	0.0443	N/A	chr17:7673761	173	3901	8;8;8;8	11;12;12;11	N/A	N/A	N/A	N/A	N/A	N/A	COSM1646819;COSM214243;COSM44133;COSM4735391	22	11	lung (1 confirmed somatic of 7);large_intestine (2 confirmed somatic of 3);oesophagus (1 confirmed somatic of 3)	BLCA (Number of Cases: 2);LUSC (Number of Cases: 1);READ (Number of Cases: 1)	Absent	N/A	N/A	N/A	N/A	N/A	N/A	19206530	76	4
[truncated: 36 more columns]
